# Supplementary material for: The safety profile of Haemophilus influenzae type b–Neisseria meningitidis serogroups C and Y tetanus toxoid conjugate vaccine (HibMenCY)
Source: PubMed Central journal article supplement — Hum Vaccin Immunother. 2012 Mar 1;8(3):304–11. doi: 10.4161/hv.18752 (PMC3426078; doi:10.4161/hv.18752), 2012-03-01
Supplement: hvi-8-304-s01.pdf [file hvi-8-304-s01.pdf]

**Supplemental Material to:**

Stephen Rinderknecht, Kristina Bryant, Terry Nolan, Noris Pavia-Ruz, Carlos Aranza Doniz, Miguel Angel Rodriguez Weber, Christopher Cohen, Emmanuel Aris, Narcisa Mesaros and Jacqueline M Miller. The safety profile of *Haemophilus influenzae* type b-*Neisseria meningitidis* serogroups C and Y tetanus toxoid conjugate vaccine (HibMenCY). *Human Vaccines & Immunotherapeutics* 2012; 8(3); <http://dx.doi.org/10.4161/hv.8.3.18752>  
<http://www.landesbioscience.com/journals/vaccines/article/18752>

**Supplementary Table:** Relative risk of serious adverse events (with an incidence of at least 0.1% but <0.3% in either group), reported from Dose 1 until 6 months post-dose 4 (Total vaccinated cohort, all studies)

| Symptom (Preferred term)                | HibMenCY  | Hib       | Relative Risk       | p-value |
|-----------------------------------------|-----------|-----------|---------------------|---------|
|                                         | N=6414    | N=2157    |                     |         |
|                                         | n (%)     | n (%)     | [95% CI]            |         |
| At least one                            | 388 (6.0) | 130 (6.0) | 1.00 [0.82; 1.23]   | 1.00    |
| Intussusception                         | 4 (0.1)   | 3 (0.1)   | 0.45 [0.08; 3.05]   | 0.49    |
| Vomiting                                | 3 (0.0)   | 3 (0.1)   | 0.34 [0.05; 2.53]   | 0.35    |
| Pyrexia                                 | 7 (0.1)   | 3 (0.1)   | 0.79 [0.18; 4.74]   | 0.97    |
| Sudden infant death syndrome            | 4 (0.1)   | 2 (0.1)   | 0.67 [0.10; 7.42]   | 0.94    |
| Cellulitis                              | 4 (0.1)   | 1 (0.0)   | 1.35 [0.13; 66.38]  | 1.00    |
| Croup infectious                        | 8 (0.1)   | 4 (0.2)   | 0.68 [0.18; 3.07]   | 0.72    |
| Gastroenteritis rotavirus               | 11 (0.2)  | 3 (0.1)   | 1.24 [0.33; 6.95]   | 1.00    |
| Gastroenteritis viral                   | 2 (0.0)   | 2 (0.1)   | 0.34 [0.02; 4.68]   | 0.53    |
| Influenza                               | 2 (0.0)   | 2 (0.1)   | 0.34 [0.02; 4.68]   | 0.53    |
| Otitis media                            | 11 (0.2)  | 5 (0.2)   | 0.74 [0.24; 2.73]   | 0.76    |
| Pharyngitis                             | 2 (0.0)   | 2 (0.1)   | 0.33 [0.02; 4.60]   | 0.52    |
| Pyelonephritis                          | 4 (0.1)   | 1 (0.0)   | 1.35 [0.13; 66.61]  | 1.00    |
| Respiratory syncytial virus infection   | 7 (0.1)   | 4 (0.2)   | 0.59 [0.15; 2.77]   | 0.59    |
| Staphylococcal infection                | 5 (0.1)   | 0 (0.0)   | INF [0.31; INF]     | 0.46    |
| Tracheitis                              | 1 (0.0)   | 3 (0.1)   | 0.11 [0.00; 1.39]   | 0.10    |
| Upper respiratory tract infection       | 7 (0.1)   | 1 (0.0)   | 2.37 [0.30; 106.83] | 0.72    |
| Urinary tract infection                 | 13 (0.2)  | 1 (0.0)   | 4.39 [0.66; 186.76] | 0.19    |
| Viral infection                         | 16 (0.2)  | 3 (0.1)   | 1.79 [0.51; 9.61]   | 0.51    |
| Viral upper respiratory tract infection | 2 (0.0)   | 2 (0.1)   | 0.34 [0.02; 4.68]   | 0.53    |
| Head injury                             | 12 (0.2)  | 4 (0.2)   | 1.00 [0.30; 4.26]   | 1.00    |
| Convulsion                              | 5 (0.1)   | 2 (0.1)   | 0.84 [0.14; 8.84]   | 1.00    |

|                           |          |         |                     |      |
|---------------------------|----------|---------|---------------------|------|
| Febrile convulsion        | 14 (0.2) | 5 (0.2) | 0.94 [0.32; 3.33]   | 1.00 |
| Asthma                    | 10 (0.2) | 3 (0.1) | 1.13 [0.29; 6.37]   | 1.00 |
| Bronchial hyperreactivity | 10 (0.2) | 3 (0.1) | 1.12 [0.29; 6.35]   | 1.00 |
| Hypoxia                   | 6 (0.1)  | 1 (0.0) | 2.04 [0.25; 93.65]  | 0.87 |
| Respiratory distress      | 8 (0.1)  | 1 (0.0) | 2.71 [0.36; 120.45] | 0.58 |

---

At least one symptom = at least one symptom experienced (regardless of the MedDRA Preferred Term); N = number of subjects with at least one administered dose; n (%) = number (percentage) of subjects reporting the symptom at least once; 95% CI = 95% confidence interval for relative risk (Exact Stratified Conditional to total number of cases); P-Value = 2-sided Exact Stratified Test conditional to number of cases. INF = infinity.
